# Supplementary material for: Large-scale kinetic metabolic models of Pseudomonas putida KT2440 for consistent design of metabolic engineering strategies
Source: PubMed Central journal article supplement (PMC7048048; doi:10.1186/s13068-020-1665-7), 2020-02-28

$C_{*}^{GLCDpp}$

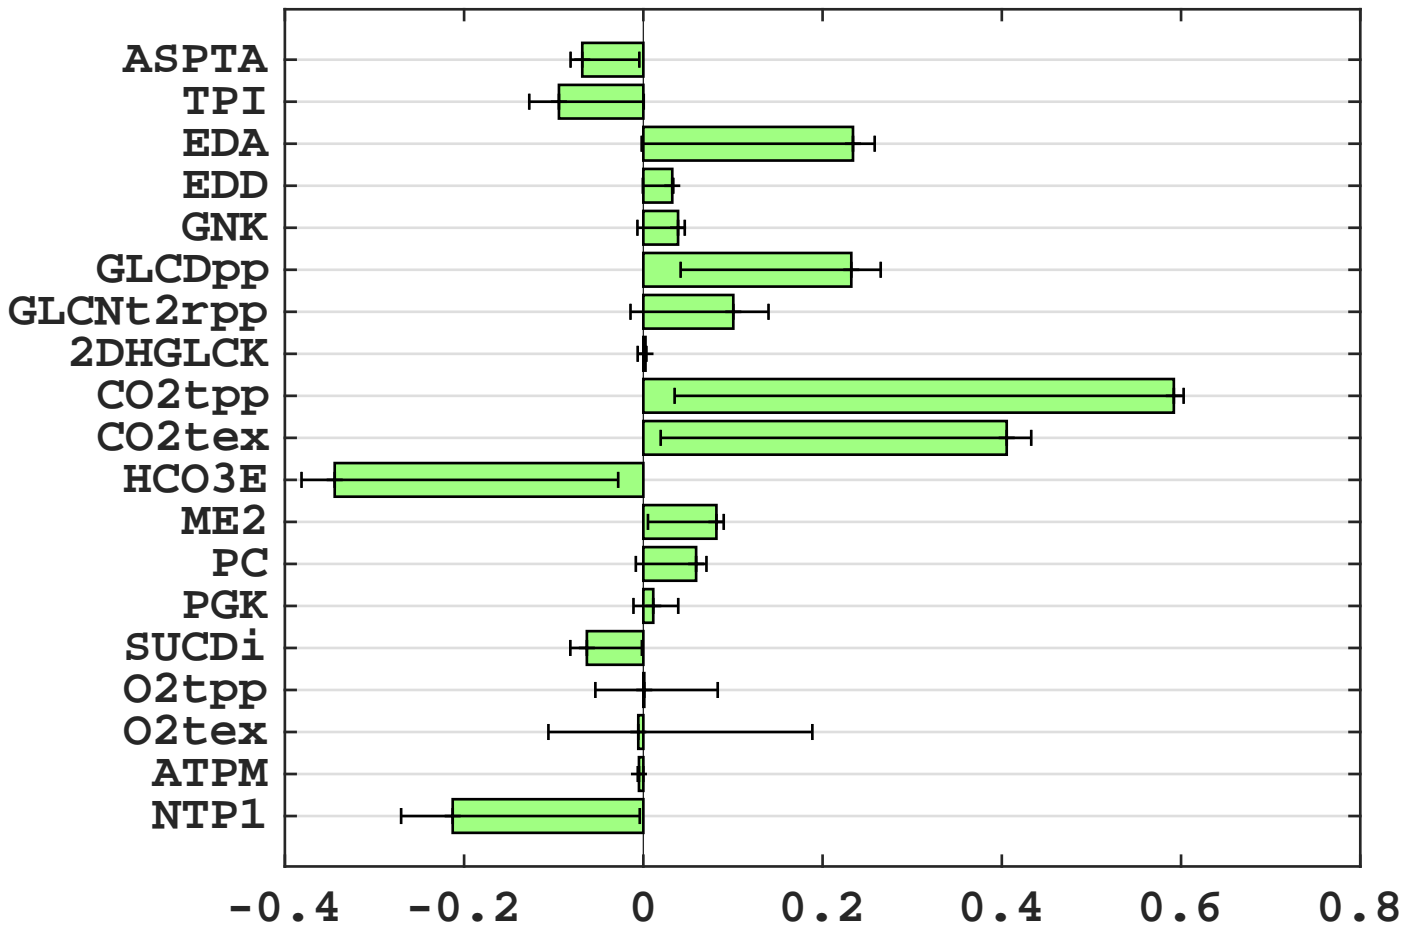

Supplement: 13068_2020_1665_MOESM7_ESM.pdf [file 13068_2020_1665_MOESM7_ESM.pdf]
